# Supplementary material
Source: publisher figshare collection journal article supplement (https://gsajournals.figshare.com/articles/dataset/_/6071009)
Supplement: Supplementary file 1 [file 1]

**A**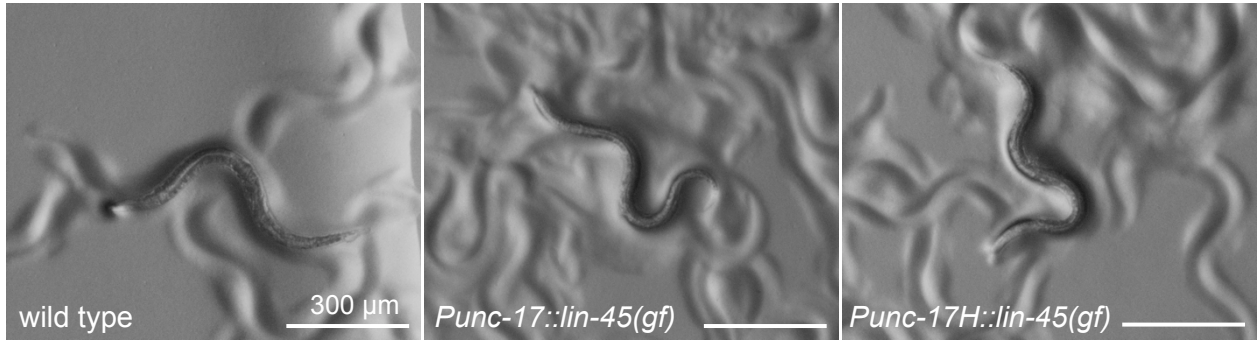**B**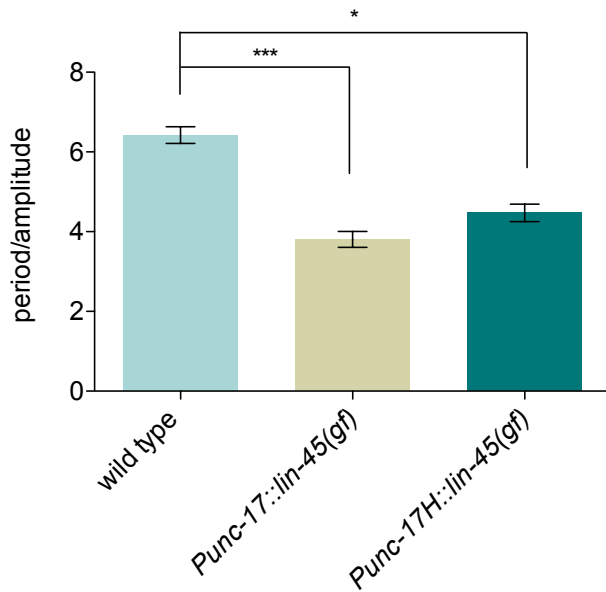**C**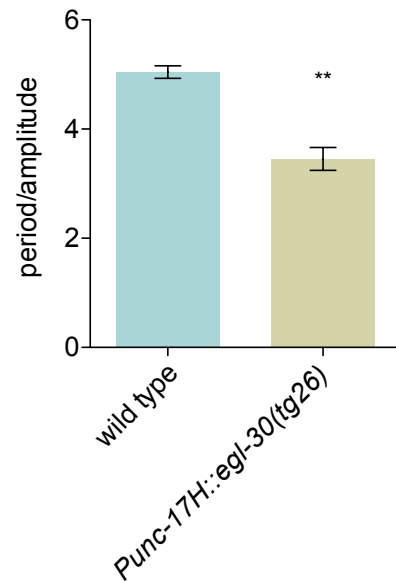

**Figure S3. Expression of activated LIN-45/Raf or EGL-30/Gq in head acetylcholine neurons is sufficient to cause locomotion with an exaggerated waveform.**

(A, B) The *yakIs34[Punc-17::lin-45(gf)]* integrated array expressing activated *lin-45*(T626E/T629D) in all acetylcholine neurons and the *yakEx154[Punc-17H::lin-45(gf)]* extrachromosomal array expressed in head acetylcholine neurons both cause a coiled posture (A) and exaggerated waveform (B).  $N \geq 12$ , \*\*\*  $P < 0.001$ , \*  $P < 0.05$ , Kruskal-Wallis test with Dunn's *post hoc* test.

(C) Expression of the activated Gq mutant *egl-30(tg26)* R243Q in head acetylcholine neurons (*Punc-17H::egl-30(tg26)*) causes an exaggerated waveform.  $N \geq 7$ , \*\*  $P < 0.01$ , unpaired T test, two-tailed. Overexpression of activated Gq is toxic and these animals were slow growing and had reduced viability and fertility.
