# Supplementary material
Source: publisher figshare collection journal article supplement (https://gsajournals.figshare.com/articles/dataset/_/6071009)
Supplement: Supplementary file 1 [file 1]

## Sheet: Sheet1
Table S3. List of primers
oBC011	Forward ksr-1 cDNA for Gateway [1-2] ENTR vector
	GGGGACAAGTTTGTACAAAAAAGCAGGCTCAatgatgcaaacccaagttgc
oBC012	Reverse ksr-1 cDNA for Gateway [1-2] ENTR vector
	GGGGACCACTTTGTACAAGAAAGCTGGGTGaaatgtcgactcgtaacttttcatc
oBC085	Forward lin-45 cDNA for Gateway [1-2] ENTR vector
	GGGGACAAGTTTGTACAAAAAAGCAGGCTcaATGAGTCGGATTAATTTCAAAAAG
oBC086	Reverse lin-45 cDNA for Gateway [1-2] ENTR vector
	GGGGACCACTTTGTACAAGAAAGCTGGGTgCTAAATGAGACCATAGACATTGTAGTATG
oBC094	Reverse lin-45 T626E mutagenesis
	gttcactgtccatttcgttttgacctctgccaagccgaaatctccaatttt
oBC095	Forward lin-45 T626E mutagenesis
	aaaattggagatttcggcttggcagaggtcaaaacgaaatggacagtgaac
oBC096	Reverse lin-45 T629D mutagenesis
	cctccgttcactgtccatttatctttgacctctgccaagccga
oBC097	Forward lin-45 T629D mutagenesis
	tcggcttggcagaggtcaaagataaatggacagtgaacggagg
oBC105	Forward let-60 cDNA for Gateway [1-2] ENTR vector
	GGGGACAAGTTTGTACAAAAAAGCAGGCTCAatgacggagtacaagcttgtgg
oBC106	Reverse let-60 cDNA for Gateway [1-2] ENTR vector
	GGGGACCACTTTGTACAAGAAAGCTGGGTGtcacattatttgacacttcttcttcttttg
oBC109	Reverse let-60 S17N mutagenesis
	ttgaatggtgagtgcatttttaccaactcctccatctccaactacca
oBC110	Forward let-60 S17N mutagenesis
	tggtagttggagatggaggagttggtaaaaatgcactcaccattcaa
oET252	Forward egl-30 cDNA for Gateway [1-2] ENTR vector
	GGGGACAAGTTTGTACAAAAAAGCAGGCTcaATGGCCTGCTGTTTATCCG
oET253	Reverse egl-30 cDNA for Gateway [1-2] ENTR vector
	GGGGACCACTTTGTACAAGAAAGCTGGGTgTTACACCAAGTTGTACTCCTTCAG
oET254	Forward egl-30(tg26) R243Q mutagenesis
	TGTGACAACGAGAACCGAATGGAAGAATCGAAAGC
oET255	Reverse egl-30(tg26) R243Q mutagenesis
	GCTTTCGATTCTTCCATTCGGTTCTCGTTGTCACA
