# Supplementary material
Source: publisher figshare collection journal article supplement (https://gsajournals.figshare.com/articles/dataset/_/6071009)
Supplement: Supplementary file 3 [file 1]

**A**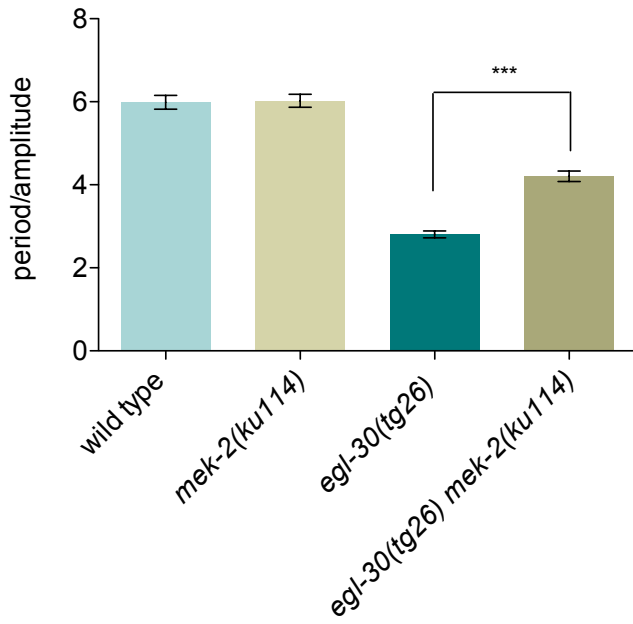**B**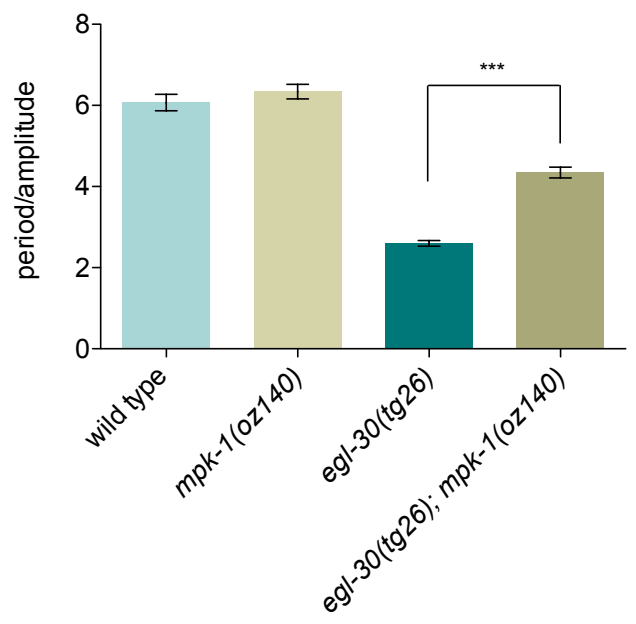

**Figure S1. Additional mutations in *mek-2* and *mpk-1* suppress activated Gq.**

(A) The *mek-2(ku114)* mutation suppresses the exaggerated waveform of *egl-30(tg26)*.  $N \geq 14$ , \*\*\*  $P < 0.001$ , one-way ANOVA with Bonferroni's *post hoc* test.

(B) The *mpk-1(oz140)* mutation suppresses the exaggerated waveform of *egl-30(tg26)*.  $N \geq 12$ , \*\*\*  $P < 0.001$ , one-way ANOVA with Bonferroni's *post hoc* test.
